# Supplementary material for: Steam Explosion (STEX) of Citrus × Poncirus Hybrids with Exceptional Tolerance to Candidatus Liberibacter Asiaticus (CLas) as Useful Sources of Volatiles and Other Commercial Products
Source: MDPI journal article supplement (doi:10.3390/biology10121285), 2021-12-07
Supplement: s1 [file s1]

**Table S2. Citrus Peel Based Hydrocolloid – Value Added Analysis\***

A means of using a low valued material resulting from processing of citrus fruit for juice to produce a potentially high valued hydrocolloid based material in place of low valued citrus peel pellets (\$0.08 – \$0.10/lb).

**Potential STEX Hydrocolloid Product Replacement Values**

- Replace Hydroxy Propyl, Carboxy Methyl Guar @ \$2.75/lb
- Replace LM/HM Pectin @ \$6.00 – \$12.00/lb
- Replace Alginate @ \$5.00 – \$10.00/lb Food Grade

**Material Costs / One lb STEX Hydrocolloid Product**

|                                            |          |               |
|--------------------------------------------|----------|---------------|
| • Processed citrus peel                    |          |               |
| 1 lb @ \$0.00/lb                           | =        | \$0.00        |
| • Natural Gas                              |          |               |
| 0.03 Therm/lb @ \$0.46/Therm               | =        | \$0.02        |
| • Steam                                    |          |               |
| 0.22 lb/lb peel @ \$0.05/lb                | =        | \$0.01        |
| <b>Total Material Cost / Pound Product</b> | <b>=</b> | <b>\$0.03</b> |

\*Values taken from 2013-14
