# Supplementary material for: Steam Explosion (STEX) of Citrus × Poncirus Hybrids with Exceptional Tolerance to Candidatus Liberibacter Asiaticus (CLas) as Useful Sources of Volatiles and Other Commercial Products
Source: Biology (Basel). 2021 Dec 7;10(12):1285. doi: 10.3390/biology10121285 (PMC8698310; doi:10.3390/biology10121285)
Supplement: Supplementary file 1 [file biology-10-01285-s001.zip › biology_SE of Citrus Hybrids Supporting Information_For_Submission.xlsx]

## Sheet: Sugar Value
Table S1. Glucose produced from steam explosion (stex)
	glucose	glucose	fruit	residue	residue	residue	residue	residue	residue	residue	glucose	glucose	glucose	ethanol	ethanol	ethanol	ethanol
	stex, dry weight	stex, dry weight	wet weight	fresh, wet weight	fresh, wet weight	fresh, wet weight	stex, wet weight	stex, dry weight	stex, dry weight	stex, dry weight	stex,dry weight	stex, dry weight	stex, dry weight
	% (w/w)	(w/w)	pounds per acre	% left over after juicing	left over after juicing	pounds per acre	pounds per acre	% (w/w)	(w/w)	pounds per acre	pounds per acre	kg per acre	kg per hectare	kg per hectare	L per hectare	gallons per hectare	$ per hectare
US-802	11.8588	0.118588	32569	52.9	0.529	17229	17683.8	13.72	0.1372	2426.22	287.722	130.508	322.493	161.247	204.11	763.37	1053.45	US-802
US-897	12.2298	0.122298	16840	53.4	0.534	8992.56	9341.47	12.37	0.1237	1155.54	141.32	64.1017	158.399	79.1994	100.252	374.944	517.422	US-897
US-942	12.6174	0.126174	25931	51.3	0.513	13302.6	14013	15.35	0.1535	2150.99	271.399	123.105	304.198	152.099	192.53	720.063	993.686	US-942
	residue	residue	residue	residue
	stex	fresh
	dry weight	dry weight	dry weight diff	dry weight diff
	% (w/w)	% (w/w)	% (w/w)
US-802	13.72	16.36	2.64	0.0264
US-897	12.37	16.25	3.88	0.0388
US-942	15.35	20.69	5.34	0.0534

## Sheet: Peel Oil Value
Peel oil produced from steam explosion (stex)
	peel oil	peel oil	fruit	residue	residue	residue	residue	residue	residue	residue	residue	peel oil	peel oil	peel oil	peel oil	peel oil	peel oil
	stex,dry weight	stex,dry weight	wet weight	fresh, wet weight	fresh, wet weight	fresh, wet weight	stex, wet weight	stex, dry weight	stex, dry weight	stex, dry weight	stex, dry weight	stex,dry weight	stex, density	stex, dry weight	stex, dry weight	stex, dry weight	(orange)
	% (v/w)	(mL/g)	pounds per acre	% left over after juicing	left over after juicing	pounds per acre	pounds per acre	% (w/w)	(w/w)	pounds per acre	grams per acre	mL per acre	g/mL	g per acre	kg per acre	kg per hectare	$ per hectare
US-802	0.417	0.00417	32569	52.9	0.529	17229	17683.8	13.72	0.1372	2426.22	1.10052e+06	4589.15	0.9263	4250.93	4.25093	10.5043	47.2692	US-802
US-897	2.443	0.02443	16840	53.4	0.534	8992.56	9341.47	12.37	0.1237	1155.54	524144	12804.8	0.8452	10822.6	10.8226	26.7433	120.345	US-897
US-942	2.83	0.0283	25931	51.3	0.513	13302.6	14013	15.35	0.1535	2150.99	975672	27611.5	0.8436	23293.1	23.2931	57.5584	259.013	US-942
	residue	residue	residue	residue
	stex	fresh
	dry weight	dry weight	dry weight diff	dry weight diff
	% (w/w)	% (w/w)	% (w/w)
US-802	13.72	16.36	2.64	0.0264
US-897	12.37	16.25	3.88	0.0388
US-942	15.35	20.69	5.34	0.0534
	peel oil	peel oil	peel oil	peel oil
	stex	fresh
	dry weight	dry weight	dry weight diff	dry weight diff	% difference
	% (v/w)	% (v/w)	% (v/w)	mL/g
US-802	0.372	0.789	0.417	0.00417	52.8517
US-897	0.508	2.951	2.443	0.02443	82.7855
US-942	0.491	3.321	2.83	0.0283	85.2153

## Sheet: Pectin Value
Pectic hydrocolloids produced from acid extraction and steam explosion (stex)
	fruit	residue (peel)	residue (peel)	residue (peel)
	wet weight	fresh, wet weight	fresh, dry weight	fresh, dry weight
	pounds per acre	% left over after juicing	% left over after juicing	% (w/w)	Metric Tons/Acre	Metric Tons Peel/Acre	Kilograms Peel (Wet)/Acre	Kilograms Peel (Dry)/Acre
US-802	32569	52.9	8.65444	16.36	14.7731	7.81495	7814.95	1278.53	US-802
US-897	16840	53.4	8.6775	16.25	7.6385	4.07896	4078.96	662.831	US-897
US-942	25931	51.3	10.614	20.69	11.7621	6.03397	6033.97	1248.43	US-942
	fruit	residue (peel)	residue	residue	residue	residue	residue	residue	residue
	wet weight	fresh, wet weight	fresh, wet weight	fresh, wet weight	stex, wet weight	stex, dry weight	stex, dry weight	stex, dry weight	stex, dry weight
	pounds per acre	% left over after juicing	left over after juicing	pounds per acre	pounds per acre	% (w/w)	(w/w)	pounds per acre	kilgrams per acre
US-802	32569	52.9	0.529	17229	17683.8	13.72	0.1372	2426.22	1100.52	US-802
US-897	16840	53.4	0.534	8992.56	9341.47	12.37	0.1237	1155.54	524.145	US-897
US-942	25931	51.3	0.513	13302.6	14013	15.35	0.1535	2150.99	975.674	US-942
	% Dry Wt	fresh/stex	g fresh · g stex-1 (DW)	g fresh · 100 g stex-1 (DW)	g GalA Yield · 100 g stex-1	g GalA Yield · 100 g fresh-1	g GalA Yield · kg fresh-1	% Recovery	Theoretical Pectin Yield (MT)/Acre	Value/Acre @ $20/kg	Theoretical Pectin Yield (MT)/hectare	Value/hectare @ 20/kg
US 802 stex	13.72	0.838631	0.838631	83.8631	2.02058	2.40938	24.0938	2.40938	0.0308045	616.091	0.0761196	1522.39	US 802 stex/acid extract
US 802 fresh	16.36
US 897 stex	12.37	0.761231	0.761231	76.1231	1.84999	2.43027	24.3027	2.43027	0.0161086	322.171	0.0398051	796.102	US 897 stex/acid extract
US 897 fresh	16.25
US 942 stex	15.35	0.741904	0.741904	74.1904	2.4471	3.2984	32.984	3.2984	0.0411781	823.562	0.101753	2035.07	US 942 stex/acid extract
US 942 fresh	20.69
								Total fresh	0.0880912	1761.82	0.217678
	% Dry Wt	% Dry Wt Diff	Dry Wt Diff					Value @ $20/kg	1761.82
US 802 stex	13.72
US 802 fresh	16.36	2.64	0.0264	US 802
US 897 stex	12.37
US 897 fresh	16.25	3.88	0.0388	US 897		g GalA Yield · 100 g stex-1	g GalA Yield · kg stex-1	% Recovery	Theoretical Pectin Yield (MT)/Acre	Theoretical Pectin Yield (MT)/hectare	Theoretical Pectin Yield (kg)/acre	Theoretical Pectin Yield (kg)/hectare
US 942 stex	15.35				US 802 stex	2.02058	20.2058	2.02058	0.0222368	0.0549484	22.2368	54.9484	US 802 stex
US 942 fresh	20.69	5.34	0.0534	US 942	US 897 stex	1.84999	18.4999	1.84999	0.00969665	0.0239609	9.69665	23.9609	US 897 stex
					US 942 stex	2.4471	24.471	2.4471	0.0238757	0.058998	23.8757	58.998	US 942 stex

## Sheet: Flavonoid Value
Flavonoids produced from steam explosion (stex)
	flavonoid	flavonoid	fruit	residue	residue	residue	residue	residue	residue	residue	flavonoid	flavonoid	flavonoid	flavonoid	flavonoid
	stex, dry weight	stex, dry weight	wet weight	fresh, wet weight	fresh, wet weight	fresh, wet weight	stex, wet weight	stex, dry weight	stex, dry weight	stex, dry weight	stex,dry weight	stex, dry weight	stex, dry weight	lower	upper
	µg/g	(w/w)	pounds per acre	% left over after juicing	left over after juicing	pounds per acre	pounds per acre	% (w/w)	(w/w)	pounds per acre	pounds per acre	kg per acre	kg per hectare	$ per hectare	$ per hectare
US-802/NAR	17513	0.017513	32569	52.9	0.529	17229	17683.8	13.72	0.1372	2426.22	42.4905	19.2733	47.6254	1428.76	3095.65	US-802/NAR
US-897/PON	22172	0.022172	16840	53.4	0.534	8992.56	9341.47	12.37	0.1237	1155.54	25.6206	11.6213	28.7169	1.72301e+06	4.30753e+06	US-897/PON
US-942/NEOHSP	11026	0.011026	25931	51.3	0.513	13302.6	14013	15.35	0.1535	2150.99	23.7168	10.7578	26.583	398.745	2392.47	US-942/NEOHSP
	residue	residue	residue	residue
	stex	fresh
	dry weight	dry weight	dry weight diff	dry weight diff
	% (w/w)	% (w/w)	% (w/w)
US-802	13.72	16.36	2.64	0.0264
US-897	12.37	16.25	3.88	0.0388
US-942	15.35	20.69	5.34	0.0534
